# Supplementary material for: Construction of a three-mode sensor based on gold nanoparticles and carbon quantum dots as probes for the detection of thiosemicarbazone
Source: Royal Society of Chemistry journal article supplement (doi:10.1039/d4ay00256c), 2024-01-01
Supplement: d4ay00256c1.pdf [file d4ay00256c1.pdf]

## **Construction of a three-mode sensor for detecting thiocarbazon based on gold nanoparticles and carbon quantum dots as probes**

Zhili Liu<sup>a</sup>, Xiaojun Wang<sup>a</sup>, Jing Li<sup>a</sup>, Wenfeng Zhou<sup>a</sup>, Haixiang Gao<sup>a</sup>, Runhua Lu<sup>a,\*</sup>

<sup>a</sup>Department of Chemistry, College of Science, China Agricultural University, Yuanmingyuan West

Road 2#, Haidian District, Beijing 100193, China

\* Corresponding author. E-mail address: Runhua Lu [rhlu@cau.edu.cn](mailto:rhlu@cau.edu.cn)

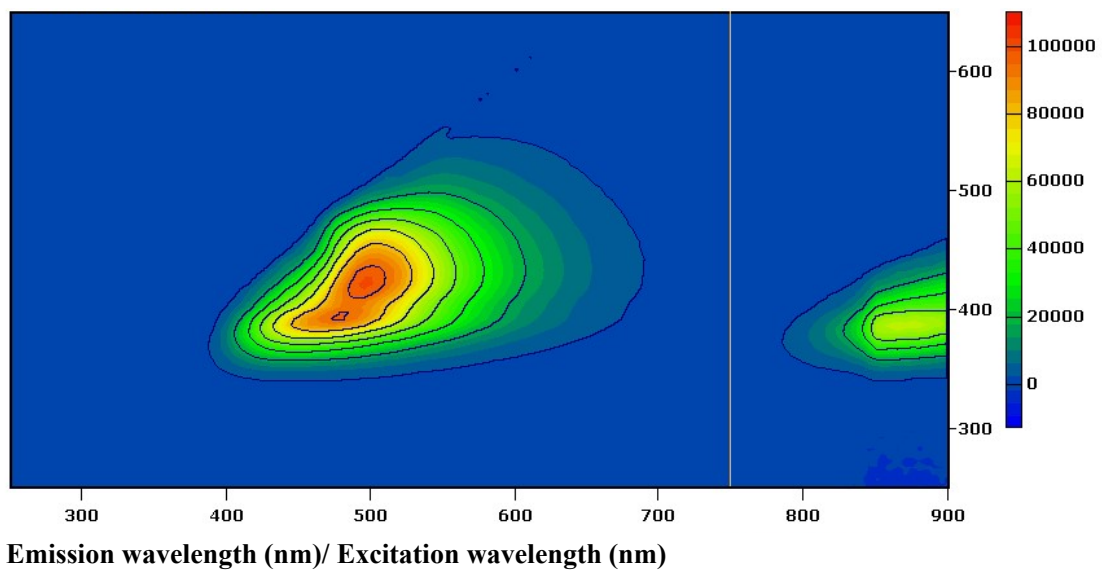

**Fig S1** Full scan image of fluorescence emission and excitation of CQDs

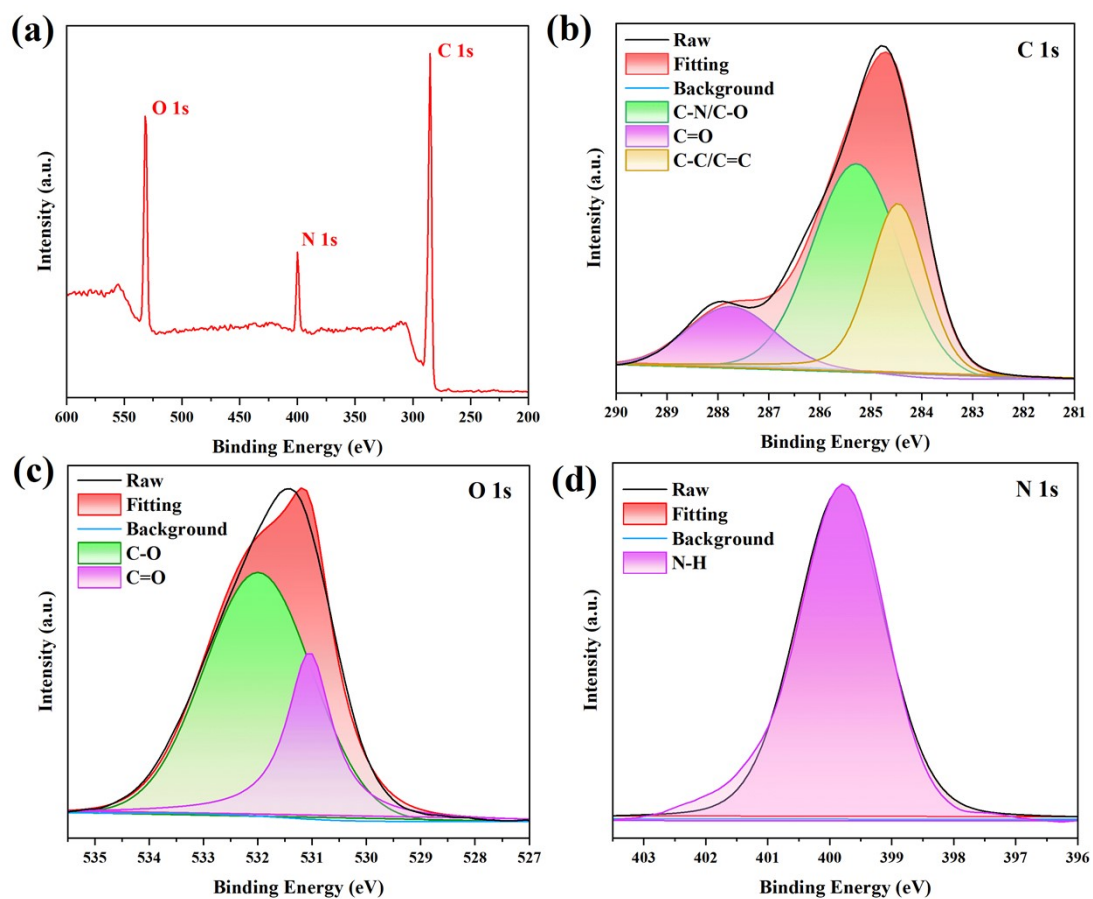

**Fig S2** XPS survey spectra of CQDs; High-resolution XPS of C 1s (b), N 1s (c) and O 1s (d) of CQDs.

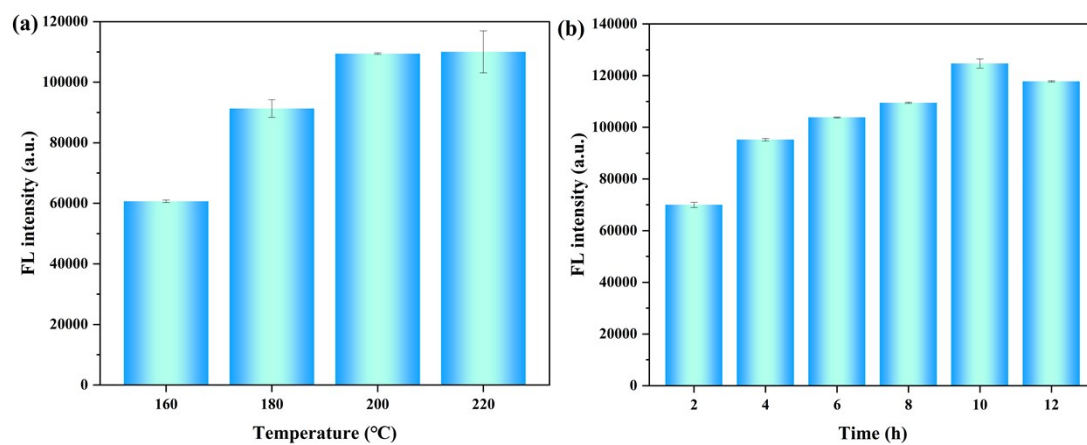

**Fig S3** Optimization of temperature,  $n=3$  (a) and time,  $n=3$  (b) during CQDs synthesis
